# Supplementary material for: Glioblastoma-derived exosomes promote lipid accumulation and induce ferroptosis in dendritic cells via the NRF2/GPX4 pathway
Source: Frontiers journal article supplement (doi:10.3389/fimmu.2024.1439191), 2024-08-13
Supplement: Data_Sheet_1.PDF [file Data_Sheet_1.PDF]

**Fig.1** sh-Rab27a3 did not affect the viability, invasion and migration of C6 cells in vitro.

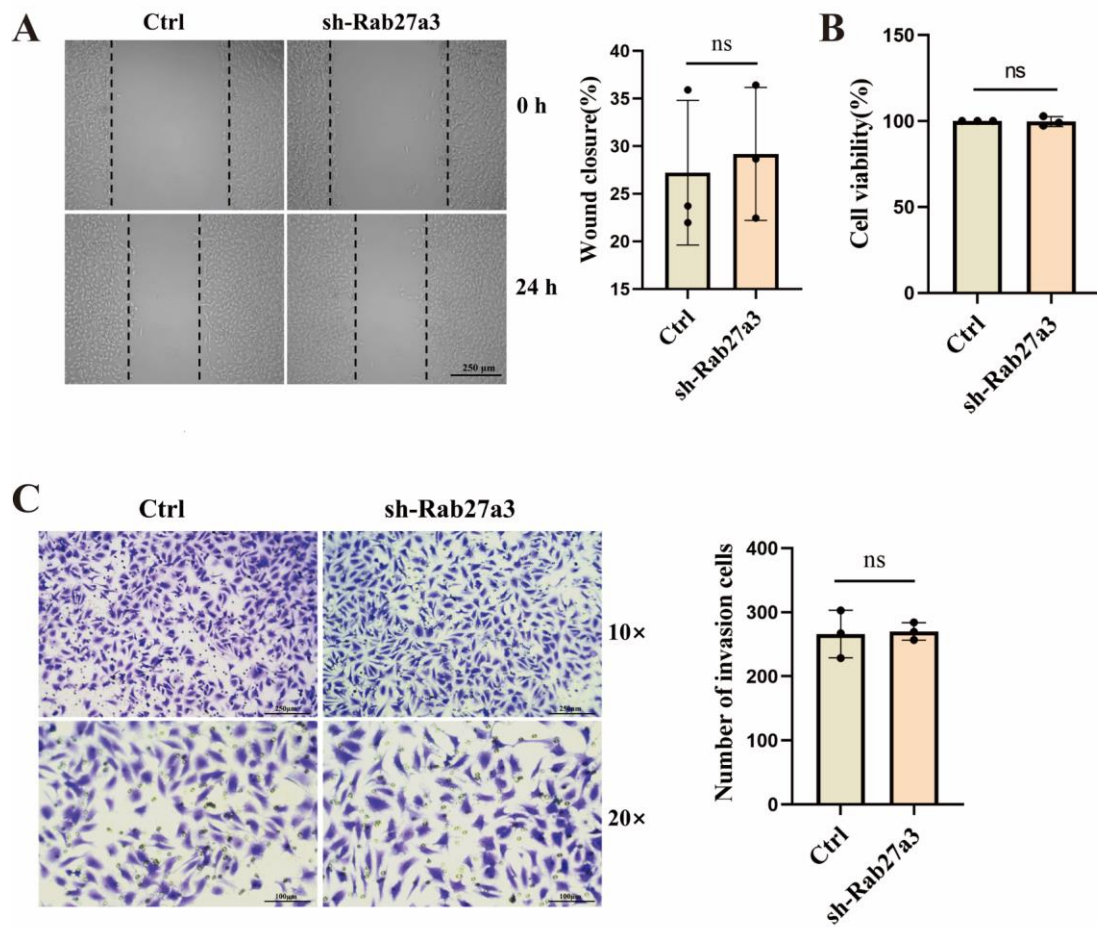

**A** Scratch assay was conducted to assess the migratory capability of C6 glioblastoma cells in both the 24 h control group and the sh-Rab27a3 group. Scale bars, 250  $\mu$ m. **B** Cell viability of C6 glioblastoma cells was assessed using the CCK8 assay in both the control group and the sh-Rab27a3 group. **C** The invasive ability of both the 24h Ctrl group and sh-Rab27a3 group was assessed through the Transwell assay, the count of invasive cells was quantified. Scale bars, 100  $\mu$ m.

**Fig.2**

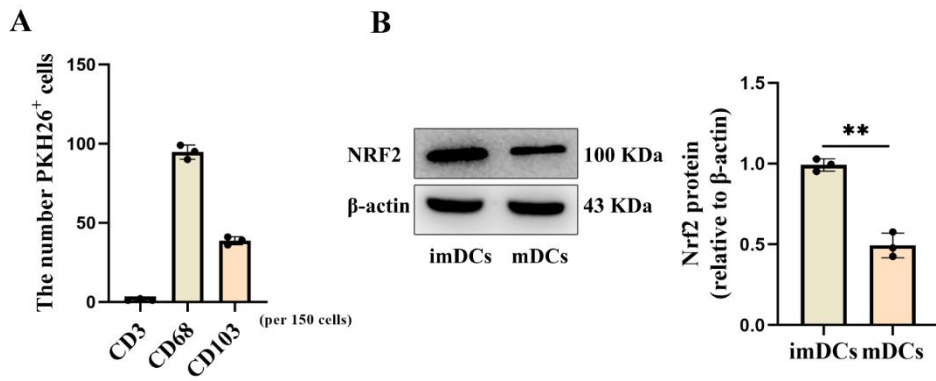

**A** PHK26-labeled GDEs to co-culture with PBMCs and assess the uptake capacity of CD3 T cells, CD68 macrophages, and CD103 dendritic cells. **B** Analysis the expression level of NRF2 protein in imDCs and mDCs.
